# Supplementary material for: Population Genetics of Oncomelania hupensis Snails from New-Emerging Snail Habitats in a Currently Schistosoma japonicum Non-Endemic Area
Source: MDPI journal article supplement (doi:10.3390/tropicalmed8010042), 2023-01-05
Supplement: s1 [file s1]

**Table S1.** Definitions of different parameters and prior distributions with DIYABC.

| Parameter                                                                         | Distribution | Interval              |
|-----------------------------------------------------------------------------------|--------------|-----------------------|
| Effective population size, $N_i$                                                  | Uniform      | 10–10,000             |
| Rates of admixture, $r_a$                                                         | Uniform      | 0.001–0.999           |
| Mean mutation rate (MEANMU)                                                       | Uniform      | $10^{-4}$ – $10^{-3}$ |
| Mean parameter of the geometric distribution<br>of the number of repeats (MEAN P) | Uniform      | 0.1–0.3               |
| Mean single nucleotide insertion/deletion<br>mutation rate (MEANSNI)              | Log-uniform  | $10^{-8}$ – $10^{-5}$ |

**Table S2.** Assumed 33 demographic history scenarios among four snail populations.

| Analysis                | Number    | Scenario             |                  |                         |
|-------------------------|-----------|----------------------|------------------|-------------------------|
|                         |           | t3                   | t2               | t1                      |
| No admixture (t1 t2 t3) | 1         | 2014→2015            | 2014→2016        | 2014→2017               |
|                         | 2         | 2014→2015            | 2014→2016        | 2015→2017               |
|                         | 3         | 2014→2015            | 2014→2016        | 2016→2017               |
|                         | 4         | 2014→2015            | 2015→2016        | 2014→2017               |
|                         | <b>5</b>  | <b>2014→2015</b>     | <b>2015→2016</b> | <b>2015→2017</b>        |
|                         | 6         | 2014→2015            | 2015→2016        | 2016→2017               |
| Admixture (t1 t2 t3)    | 7         | 2014→2015            | 2014→2016        | 2014 + 2015→2017        |
|                         | 8         | 2014→2015            | 2014→2016        | 2014 + 2016→2017        |
|                         | 9         | 2014→2015            | 2014→2016        | 2015 + 2016→2017        |
|                         | 10        | 2014→2015            | 2015→2016        | 2014 + 2015→2017        |
|                         | 11        | 2014→2015            | 2015→2016        | 2014 + 2016→2017        |
|                         | <b>12</b> | <b>2014→2015</b>     | <b>2015→2016</b> | <b>2015 + 2016→2017</b> |
|                         | 13        | 2014→2015            | 2014 + 2015→2016 | 2014→2017               |
|                         | 14        | 2014→2015            | 2014 + 2015→2016 | 2015→2017               |
|                         | 15        | 2014→2015            | 2014 + 2015→2016 | 2016→2017               |
|                         | 16        | 2014→2015            | 2014 + 2015→2016 | 2014 + 2016→2017        |
|                         | 17        | 2014→2015            | 2014 + 2015→2016 | 2015 + 2016→2017        |
| No admixture (t1 t2)    | 18        | 2014→2015; 2014→2016 |                  | 2014→2017               |

|                    |           |                      |                                    |
|--------------------|-----------|----------------------|------------------------------------|
|                    | 19        | 2014→2015; 2014→2016 | 2015→2017                          |
|                    | 20        | 2014→2015; 2014→2016 | 2016→2017                          |
|                    | 21        | 2014→2015            | 2014→2016; 2014→2017               |
|                    | 22        | 2014→2015            | 2015→2016; 2014→2017               |
|                    | 23        | 2014→2015            | 2014→2016; 2015→2017               |
|                    | 24        | 2014→2015            | 2015→2016; 2015→2017               |
| Admixture (t1 t2 ) | 25        | 2014→2015; 2014→2016 | 2014 + 2015→2017                   |
|                    | 26        | 2014→2015; 2014→2016 | 2015 + 2016→2017                   |
|                    | 27        | 2014→2015; 2014→2016 | 2014 + 2016→2017                   |
|                    | 28        | 2014→2015            | 2014→2016; 2014 + 2015→2017        |
|                    | <b>29</b> | 2014→2015            | 2015→2016; 2014 + 2015→2017        |
|                    | 30        | 2014→2015            | 2014 + 2015→2016; 2014→2017        |
|                    | 31        | 2014→2015            | 2014 + 2015→2016; 2015→2017        |
|                    | 32        | 2014→2015            | 2014 + 2015→2016; 2014 + 2015→2017 |
| No admixture(t1)   | 33        |                      | 2014→2015; 2014→2016; 2014→2017    |

**Table S3.** Posterior probabilities of the 33 demographic history scenarios evaluated in DIYABC analysis.

| Analysis                | Number    | Posterior Probability 95% CI |                        |
|-------------------------|-----------|------------------------------|------------------------|
| No admixture (t1 t2 t3) | 1         | 0.0001                       | [0.0000,0.0033]        |
|                         | 2         | 0.0096                       | [0.0052,0.0140]        |
|                         | 3         | 0.0026                       | [0.0000,0.0058]        |
|                         | 4         | 0.0003                       | [0.0000,0.0035]        |
|                         | <b>5</b>  | <b>0.8506</b>                | <b>[0.8298,0.8714]</b> |
|                         | 6         | 0.1368                       | [0.1164,0.1572]        |
| Admixture (t1 t2 t3)    | 7         | 0.0001                       | [0.0000,0.0106]        |
|                         | 8         | 0.0002                       | [0.0000,0.0106]        |
|                         | 9         | 0.0034                       | [0.0000,0.0138]        |
|                         | 10        | 0.0208                       | [0.0095,0.0320]        |
|                         | 11        | 0.0111                       | [0.0003,0.0218]        |
|                         | <b>12</b> | <b>0.7133</b>                | <b>[0.6705,0.7560]</b> |
|                         | 13        | 0.0000                       | [0.0000,0.0105]        |
|                         | 14        | 0.1990                       | [0.1579,0.2402]        |
|                         | 15        | 0.0140                       | [0.0032,0.0248]        |
|                         | 16        | 0.0016                       | [0.0000,0.0120]        |
|                         | 17        | 0.0365                       | [0.0241,0.0488]        |
| No admixture (t1 t2)    | 18        | 0.0008                       | [0.0003,0.0013]        |

|                              |           |               |                        |
|------------------------------|-----------|---------------|------------------------|
|                              | 19        | 0.0275        | [0.0201,0.0348]        |
|                              | 20        | 0.0083        | [0.0056,0.0111]        |
|                              | 21        | 0.0025        | [0.0009,0.0040]        |
|                              | 22        | 0.0014        | [0.0007,0.0022]        |
|                              | 23        | 0.0023        | [0.0010,0.0036]        |
|                              | <b>24</b> | <b>0.9572</b> | <b>[0.9483,0.9661]</b> |
| Admixture (t1 t2 )           | 25        | 0.0047        | [0.0000,0.0524]        |
|                              | 26        | 0.0456        | [0.0000,0.0915]        |
|                              | 27        | 0.0035        | [0.0000,0.0512]        |
|                              | 28        | 0.0005        | [0.0000,0.0486]        |
|                              | <b>29</b> | <b>0.4901</b> | <b>[0.4404,0.5397]</b> |
|                              | 30        | 0.0005        | [0.0000,0.0486]        |
|                              | 31        | 0.4363        | [0.3848,0.4879]        |
|                              | 32        | 0.0188        | [0.0000,0.0656]        |
| No admixture(t1)             | 33        |               |                        |
| <b>The second round</b>      |           |               |                        |
| No admixture VS<br>Admixture | 5         | 0.2561        | [0.2376,0.2747]        |
|                              | 12        | 0.1964        | [0.1811,0.2116]        |
|                              | <b>24</b> | <b>0.5326</b> | <b>[0.5114,0.5538]</b> |
|                              | 29        | 0.0138        | [0.0045,0.0230]        |
|                              | 33        | 0.0011        | [0.0000,0.0102]        |

**Table S4.** Posterior distributions of population demographic parameters from Scenario 24 with the highest posterior probability inferred by DIY ABC analysis.

| Parameter   | Mean                  | Median                | Mode                  | Quantile<br>2.50%     | Quantile<br>5.00%     | Quantile<br>95.00%    | Quantile<br>97.5%     |
|-------------|-----------------------|-----------------------|-----------------------|-----------------------|-----------------------|-----------------------|-----------------------|
| N1          | $2.38 \times 10^3$    | $2.13 \times 10^3$    | $1.82 \times 10^3$    | $6.94 \times 10^2$    | $8.55 \times 10^2$    | $4.70 \times 10^3$    | $5.88 \times 10^3$    |
| N2          | $3.85 \times 10^3$    | $3.59 \times 10^3$    | $3.29 \times 10^3$    | $1.19 \times 10^3$    | $1.47 \times 10^3$    | $7.33 \times 10^3$    | $8.37 \times 10^3$    |
| N3          | $6.21 \times 10^3$    | $6.29 \times 10^3$    | $7.02 \times 10^3$    | $2.21 \times 10^3$    | $2.79 \times 10^3$    | $9.41 \times 10^3$    | $9.71 \times 10^3$    |
| N4          | $2.76 \times 10^3$    | $2.31 \times 10^3$    | $1.44 \times 10^3$    | $5.46 \times 10^2$    | $6.95 \times 10^2$    | $6.69 \times 10^3$    | $7.85 \times 10^3$    |
| t1          | $8.04 \times 10^2$    | $6.16 \times 10^2$    | $3.32 \times 10^2$    | $1.04 \times 10^2$    | $8.95 \times 10^1$    | $2.08 \times 10^3$    | $2.78 \times 10^3$    |
| t2          | $8.09 \times 10^3$    | $8.42 \times 10^3$    | $9.75 \times 10^2$    | $4.51 \times 10^2$    | $5.10 \times 10^2$    | $9.86 \times 10^3$    | $9.93 \times 10^3$    |
| $\mu_{mic}$ | $2.28 \times 10^{-4}$ | $1.91 \times 10^{-4}$ | $1.43 \times 10^{-4}$ | $1.09 \times 10^{-4}$ | $1.15 \times 10^{-4}$ | $4.72 \times 10^{-4}$ | $5.89 \times 10^{-4}$ |
| $p_{mic}$   | $1.90 \times 10^{-1}$ | $1.85 \times 10^{-1}$ | $1.49 \times 10^{-1}$ | $1.06 \times 10^{-1}$ | $1.11 \times 10^{-1}$ | $2.82 \times 10^{-1}$ | $2.90 \times 10^{-1}$ |
| $sn_{mic}$  | $5.25 \times 10^{-6}$ | $5.47 \times 10^{-6}$ | $1.00 \times 10^{-5}$ | $8.36 \times 10^{-8}$ | $1.57 \times 10^{-7}$ | $1.00 \times 10^{-5}$ | $1.00 \times 10^{-5}$ |

N1, N2, N3 and N4, effective population sizes of the corresponding populations;

t1, divergence of 2016 and 2017 from 2015; t2, divergence of 2016 from 2015;

$\mu_{mic}$ , the mean mutation rate of SSR;

$p_{mic}$ , the mean distribution of the number of repeats of microsatellites;

$sn_{mic}$ , the mean rate of single nucleotide insertions/deletions.
